# Supplementary material for: How much does it cost to implement a community-based walking football programme for patients with type 2 diabetes?
Source: PubMed Central journal article supplement — BMJ Open Sport Exerc Med. 2023 Jun 7;9(2):e001549. doi: 10.1136/bmjsem-2023-001549 (PMC10254688; doi:10.1136/bmjsem-2023-001549), 2023-06-07
Supplement: bmjsem-2023-001549supp001.pdf [file bmjsem-2023-001549supp001.pdf]

**Supplementary appendix A** Comparison between *Diabetes em Movimento* exercise program and walking football exercise program

|                       | <i>Diabetes em Movimento</i> <sup>1</sup> |                             | <i>Diabetes em Movimento</i> |                             | Walking football  |                             |
|-----------------------|-------------------------------------------|-----------------------------|------------------------------|-----------------------------|-------------------|-----------------------------|
|                       | 2016                                      |                             | 2021*                        |                             | 2021 <sup>†</sup> |                             |
| Implementation cost   | Euro (€)                                  | International dollar (\$) # | Euro (€)                     | International dollar (\$) # | Euro (€)          | International dollar (\$) # |
| Total                 | 9,938.70 €                                | \$17,393.11                 | 12,578.99 €                  | \$22,006.78                 | 13,102.74 €       | \$22,923.07                 |
| Total/Month           | 1,104.30 €                                | \$1,932.57                  | 1,397.67 €                   | \$2,445.20                  | 1,455.86 €        | \$2,547.01                  |
| Total/Patient         | 165.64 €                                  | \$289.88                    | 209.64 €                     | \$366.77                    | 327.57 €          | \$573.08                    |
| Total/Session         | 46.01 €                                   | \$80.52                     | 58.23 €                      | \$101.88                    | 60.66 €           | \$106.13                    |
| Total/Patient/Month   | 18.40 €                                   | \$32.20                     | 23.29 €                      | \$40.74                     | 36.40 €           | \$63.68                     |
| Total/Patient/Session | 1.53 € <sup>‡</sup>                       | \$2.68                      | 1.94 €                       | \$3.39                      | 3.03 €            | \$5.31                      |

Costs represented in euros (€) and international dollars (\$) for a 9-month time horizon

\*Data calculated using the annual consumer prices inflation indicators from the World Bank (<http://data.worldbank.org/indicator/FP.CPI.TOTL.ZG>)

#Data calculated using the PPP conversion factor from the World Bank (<https://data.worldbank.org/indicator/PA.NUS.PPP>)

<sup>†</sup>December 2021

<sup>‡</sup>Calculated value

**References**

1. Mendes, R.A., AS. Costs of a community-based exercise program for patients with type 2 diabetes: case-study of *Diabetes em Movimento*®. *Aten Primaria* 2016, 48 (Espec Cong I), 25-120, Available online: [https://www.researchgate.net/publication/308761921\\_Costs\\_of\\_a\\_community-based\\_exercise\\_program\\_for\\_patients\\_with\\_type\\_2\\_diabetes\\_case-study\\_of\\_Diabetes\\_em\\_MovimentoR](https://www.researchgate.net/publication/308761921_Costs_of_a_community-based_exercise_program_for_patients_with_type_2_diabetes_case-study_of_Diabetes_em_MovimentoR).
